# Supplementary material for: Transition metal chemistry in synthetically viable alkaline earth complexes M(Cp)3− (M = Ca, Sr, Ba)
Source: Royal Society of Chemistry journal article supplement (doi:10.1039/d1cc01753e), 2021-01-01
Supplement: d1cc01753e1.pdf [file d1cc01753e1.pdf]

## Supplementary Information

### Transition metal chemistry in synthetically viable alkaline earth complexes $M(\text{Cp})_3^-$ ( $M = \text{Ca}, \text{Sr}, \text{Ba}$ )

Bin Huo,<sup>a,†</sup> Rui Sun,<sup>a,†</sup> Bo Jin,<sup>a</sup> Lingfei Hu,<sup>b</sup> Jian-Hong Bian,<sup>a</sup> Xiao-Ling Guan,<sup>a</sup> Caixia Yuan,<sup>a</sup> Gang Lu,<sup>b</sup> and Yan-Bo Wu<sup>\*a</sup>

a. The Key Laboratory of Materials for Energy Conversion and Storage of Shanxi Province, Institute of Molecular Science, Shanxi University, Taiyuan 030006, People's Republic of China.

b. School of Chemistry and Chemical Engineering, Shandong University, Jinan, 250100, People's Republic of China.

† Bin Huo and Rui Sun contribute equally to this work.

E-mail address: [wyb@sxu.edu.cn](mailto:wyb@sxu.edu.cn) (Y.B.W.)

## Contents

|    |                                                                                                                                                                     |        |
|----|---------------------------------------------------------------------------------------------------------------------------------------------------------------------|--------|
| 1. | Fig. S1. MO correlation diagram of $\text{Sr}^{2+}$ with three $\text{Cp}^-$ ligands.....                                                                           | S2     |
| 2. | Fig. S2. MO correlation diagram of $\text{Ba}^{2+}$ with three $\text{Cp}^-$ ligands.....                                                                           | S2     |
| 3. | Fig. S3. Optimized structures of $\text{Na}[M(\text{Cp})_3]$ ( $M = \text{Ca}, \text{Sr}, \text{Ba}$ ).....                                                         | S3     |
| 4. | Fig. S4. Optimized structures of $M(\text{Me})_3^-$ , $M(\text{Cp})(\text{Me})_2^-$ and $M(\text{Cp})_2(\text{Me})^-$ ( $M = \text{Ca}, \text{Sr}, \text{Ba}$ ).... | S4     |
| 5. | Table S1. The results concerning the Me-substitution for Cp ligands.....                                                                                            | S4     |
| 6. | Formula S1. Reduction potential calculation formula.....                                                                                                            | S5     |
| 7. | Cartesian coordinates of optimized structures of the species reported in the text.....                                                                              | S6-S21 |

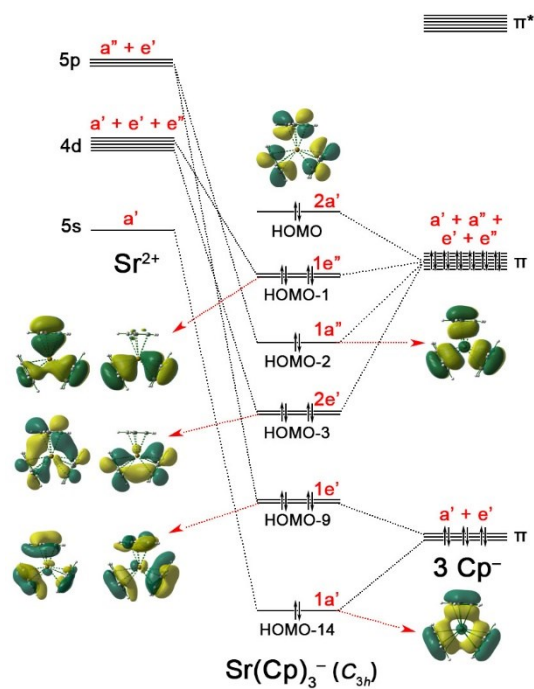

Fig. S1. MO correlation diagram of  $\text{Sr}^{2+}$  with three  $\text{Cp}^-$  ligands.

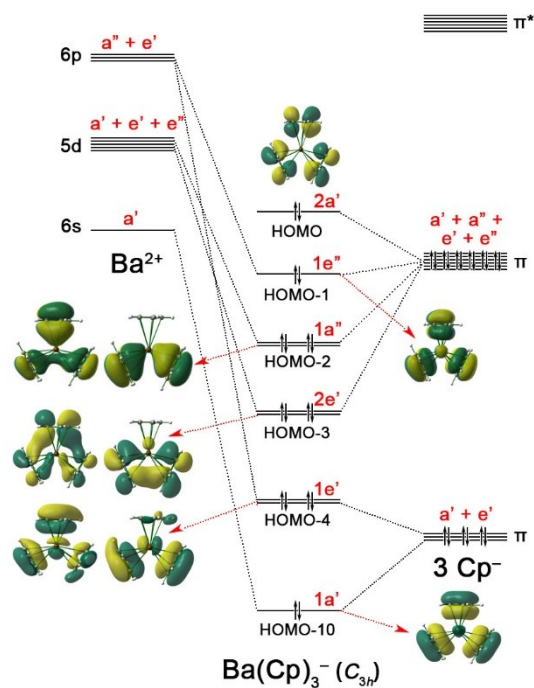

Fig. S2 MO correlation diagram of  $\text{Ba}^{2+}$  with three  $\text{Cp}^-$  ligands.

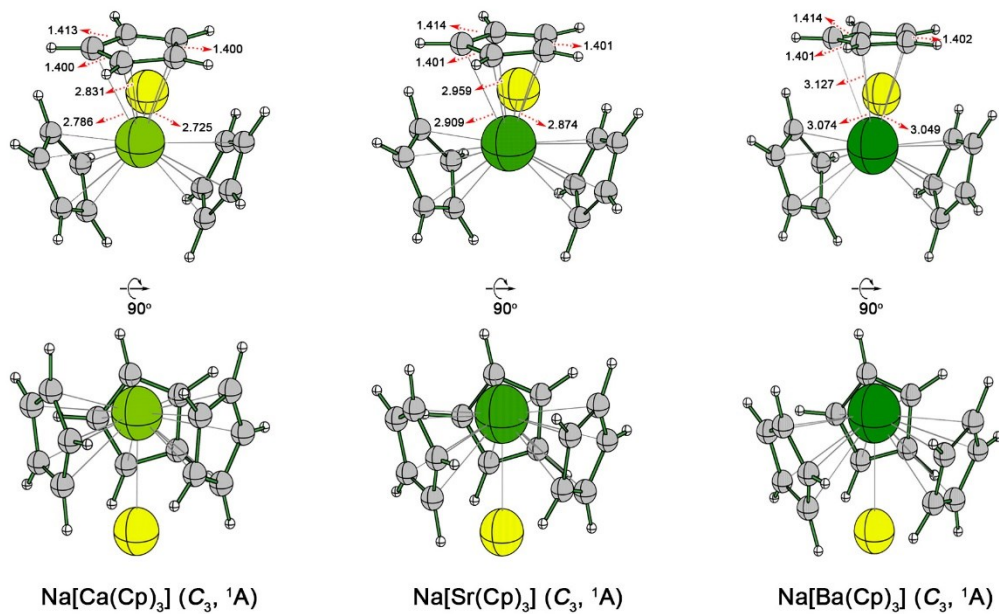

**Fig. S3.** Optimized structures of Na[M(Cp)<sub>3</sub>] (M = Ca, Sr, Ba)

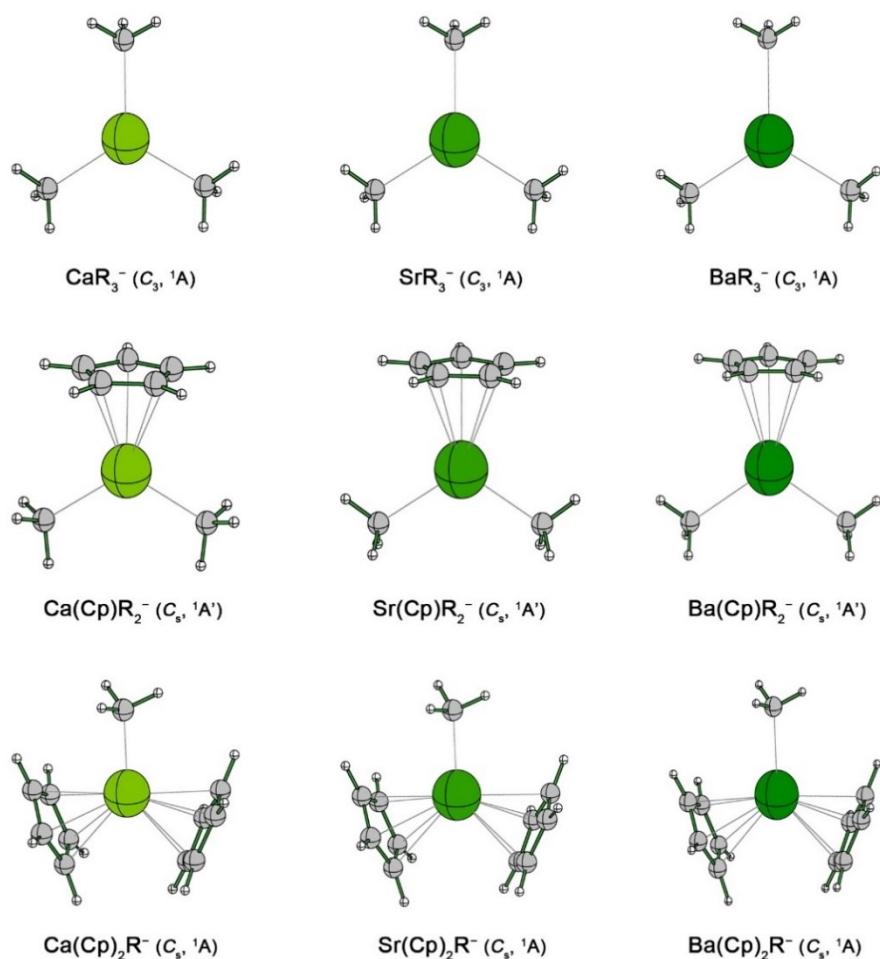

**Fig. S4.** Optimized structures of  $\text{M}(\text{Me})_3^-$ ,  $\text{M}(\text{Cp})(\text{Me})_2^-$  and  $\text{M}(\text{Cp})_2(\text{Me})^-$  ( $\text{M} = \text{Ca}, \text{Sr}, \text{Ba}$ )

**Table S1.** The lowest vibrational frequencies ( $\nu_{\text{min}}$ ) in  $\text{cm}^{-1}$ , the HOMO energy levels ( $E_{\text{HOMO}}$ ), the HOMO-LUMO gaps (Gap), the VDEs and VEA in eV, and the binding energies (BEs, in kcal/mol) at the M06-2X-D3/def2-TZVPP level. The BEs were calculated in three manners: regarding free positive metal centre and negative ligands ( $\text{BE}_{\text{Tot}}$ ), regarding neutral metal, two neutral ligands and a negative Me anion ( $\text{BE}_{\text{neu}}$ ), and regarding binding a  $\text{Me}^-$  by a  $\text{M}(\text{Me})_2$ ,  $\text{M}(\text{Cp})\text{Me}$ , or  $\text{M}(\text{Cp})_2$  ( $\text{BE}_{\text{Me}}$ ).

|                                            | $\nu_{\text{min}}$ | $E_{\text{HOMO}}$ | Gap  | VDE  | VEA  | $\text{BE}_{\text{Tot}}$ | $\text{BE}_{\text{neu}}$ | $\text{BE}_{\text{Me}}$ |
|--------------------------------------------|--------------------|-------------------|------|------|------|--------------------------|--------------------------|-------------------------|
| $C_3 \text{ Ca}(\text{Me})_3^-$            | 33                 | -2.32             | 5.79 | 3.37 | 4.43 | -564.8                   | -145.4                   | -71.2                   |
| $C_3 \text{ Sr}(\text{Me})_3^-$            | 45                 | -2.19             | 5.26 | 3.22 | 3.95 | -527.0                   | -134.9                   | -66.9                   |
| $C_3 \text{ Ba}(\text{Me})_3^-$            | 24                 | -2.05             | 4.58 | 3.03 | 3.27 | -492.1                   | -135.8                   | -56.9                   |
| $C_s \text{ Ca}(\text{Cp})(\text{Me})_2^-$ | 9                  | -2.28             | 5.68 | 3.27 | 4.46 | -554.2                   | -64.4                    | -134.8                  |
| $C_s \text{ Sr}(\text{Cp})(\text{Me})_2^-$ | 2                  | -2.19             | 5.27 | 3.17 | 3.98 | -520.3                   | -64.5                    | -128.2                  |
| $C_s \text{ Ba}(\text{Cp})(\text{Me})_2^-$ | 10                 | -2.07             | 4.57 | 3.00 | 3.24 | -486.2                   | -60.4                    | -129.9                  |
| $C_s \text{ Ca}(\text{Cp})_2\text{Me}^-$   | 10                 | -2.43             | 5.73 | 3.33 | 4.26 | -542.0                   | -149.7                   | -60.1                   |
| $C_s \text{ Sr}(\text{Cp})_2\text{Me}^-$   | 7                  | -2.37             | 5.41 | 3.27 | 3.96 | -510.2                   | -145.3                   | -60.6                   |
| $C_s \text{ Ba}(\text{Cp})_2\text{Me}^-$   | 8                  | -2.23             | 4.68 | 3.09 | 3.19 | -479.1                   | -150.0                   | -58.3                   |

Formula S1: Reduction potential calculation formula

$$K = \exp\left(\frac{-\Delta G}{RT}\right) \quad (1)$$

$$E = E^\theta - \frac{0.059 \log K}{2} \quad (2)$$

### Cartesian Coordinates for the structures shown in Fig. 1 .

M06-2X-D3/def2-TZVPP-optimized structures (in Cartesian coordinates) for structures shown in Fig. 1

Ca(Cp)<sub>3</sub><sup>-</sup> (C<sub>3h</sub>,<sup>1</sup>A') E<sub>CCSD(T)/M06-2X</sub> = -1256.768262 a.u

|    |             |             |             |
|----|-------------|-------------|-------------|
| C  | -2.65722004 | 0.84824764  | 0.00000000  |
| H  | -3.39330093 | 0.05957625  | 0.00000000  |
| C  | -2.07270604 | 1.43241595  | 1.13930900  |
| H  | -2.31105745 | 1.19648429  | 2.16648900  |
| C  | -1.13792535 | 2.39788602  | 0.70302300  |
| H  | -0.51760481 | 3.01272008  | 1.33761300  |
| C  | -2.07270604 | 1.43241595  | -1.13930900 |
| H  | -2.31105745 | 1.19648429  | -2.16648900 |
| C  | -1.13792535 | 2.39788602  | -0.70302300 |
| H  | -0.51760481 | 3.01272008  | -1.33761300 |
| C  | 2.64559288  | -0.21347075 | -0.70302300 |
| H  | 2.86789453  | -1.05810112 | -1.33761300 |
| C  | 2.64559288  | -0.21347075 | 0.70302300  |
| H  | 2.86789453  | -1.05810112 | 1.33761300  |
| C  | 2.27686162  | 1.07880811  | 1.13930900  |
| H  | 2.19171452  | 1.40319232  | 2.16648900  |
| C  | 2.27686162  | 1.07880811  | -1.13930900 |
| H  | 2.19171452  | 1.40319232  | -2.16648900 |
| C  | 2.06321403  | 1.87709624  | 0.00000000  |
| H  | 1.74824501  | 2.90889669  | 0.00000000  |
| C  | -1.50766753 | -2.18441527 | -0.70302300 |
| H  | -2.35028972 | -1.95461896 | -1.33761300 |
| C  | -1.50766753 | -2.18441527 | 0.70302300  |
| H  | -2.35028972 | -1.95461896 | 1.33761300  |
| C  | -0.20415558 | -2.51122406 | 1.13930900  |
| H  | 0.11934293  | -2.59967661 | 2.16648900  |
| C  | -0.20415558 | -2.51122406 | -1.13930900 |
| H  | 0.11934293  | -2.59967661 | -2.16648900 |
| C  | 0.59400602  | -2.72534388 | 0.00000000  |
| H  | 1.64505592  | -2.96847294 | 0.00000000  |
| Ca | -0.00000000 | 0.00000000  | 0.00000000  |

Sr(Cp)<sub>3</sub><sup>-</sup> (C<sub>3h</sub>, <sup>1</sup>A<sub>1</sub>) E<sub>CCSD(T)/M06-2X</sub> = -610.3691527 a.u

|    |             |             |             |
|----|-------------|-------------|-------------|
| C  | -1.64403110 | -2.39738608 | 0.00000000  |
| H  | -1.07967900 | -3.31760479 | 0.00000000  |
| C  | -2.06187150 | -1.68274527 | 1.13952600  |
| H  | -1.90306618 | -1.97856807 | 2.16679200  |
| C  | -2.74991004 | -0.52853861 | 0.70334100  |
| H  | -3.19125363 | 0.22679822  | 1.33685200  |
| C  | -2.06187150 | -1.68274527 | -1.13952600 |
| H  | -1.90306618 | -1.97856807 | -2.16679200 |
| C  | -2.74991004 | -0.52853861 | -0.70334100 |
| H  | -3.19125363 | 0.22679822  | -1.33685200 |
| C  | 0.91722716  | 2.64576126  | -0.70334100 |
| H  | 1.79203984  | 2.65030761  | -1.33685200 |
| C  | 0.91722716  | 2.64576126  | 0.70334100  |
| H  | 1.79203984  | 2.65030761  | 1.33685200  |
| C  | -0.42636441 | 2.62700573  | 1.13952600  |
| H  | -0.76195712 | 2.63738770  | 2.16679200  |
| C  | -0.42636441 | 2.62700573  | -1.13952600 |
| H  | -0.76195712 | 2.63738770  | -2.16679200 |
| C  | -1.25418170 | 2.62246574  | 0.00000000  |
| H  | -2.33329053 | 2.59383184  | 0.00000000  |
| C  | 1.83268289  | -2.11722265 | -0.70334100 |
| H  | 1.39921380  | -2.87710583 | -1.33685200 |
| C  | 1.83268289  | -2.11722265 | 0.70334100  |
| H  | 1.39921380  | -2.87710583 | 1.33685200  |
| C  | 2.48823590  | -0.94426046 | 1.13952600  |
| H  | 2.66502331  | -0.65881962 | 2.16679200  |
| C  | 2.48823590  | -0.94426046 | -1.13952600 |
| H  | 2.66502331  | -0.65881962 | -2.16679200 |
| C  | 2.89821280  | -0.22507966 | 0.00000000  |
| H  | 3.41296953  | 0.72377296  | 0.00000000  |
| Sr | 0.00000000  | -0.00000000 | -0.00000000 |

Ba(Cp)<sub>3</sub><sup>-</sup> (C<sub>3h</sub>, <sup>1</sup>A') E<sub>CCSD(T)/M06-2X</sub> = -605.1557864 a.u

|    |             |             |              |
|----|-------------|-------------|--------------|
| C  | -2.33768020 | 1.99218541  | 0.00000000   |
| H  | -3.30305064 | 1.50780163  | 0.00000000   |
| C  | -1.59423551 | 2.35788323  | 1.13932600   |
| H  | -1.90368912 | 2.22687937  | 2.16673200   |
| C  | -0.39177631 | 2.95579184  | 0.70353600   |
| H  | 0.39034597  | 3.34944558  | 1.33662600   |
| C  | -1.59423551 | 2.35788323  | -1.13932600  |
| H  | -1.90368912 | 2.22687937  | -2.16673200  |
| C  | -0.39177631 | 2.95579184  | -0.70353600  |
| H  | 0.39034597  | 3.34944558  | -1.33662600  |
| C  | 2.75567898  | -1.13860768 | -0.70353600  |
| H  | 2.70553197  | -2.01277232 | -1.33662600  |
| C  | 2.75567898  | -1.13860768 | 0.70353600   |
| H  | 2.70553197  | -2.01277232 | 1.33662600   |
| C  | 2.83910453  | 0.20170683  | 1.13932600   |
| H  | 2.88037866  | 0.53520345  | 2.16673200   |
| C  | 2.83910453  | 0.20170683  | -1.13932600  |
| H  | 2.88037866  | 0.53520345  | -2.16673200  |
| C  | 2.89412327  | 1.02839774  | 0.00000000   |
| H  | 2.95731983  | 2.10662495  | 0.00000000   |
| C  | -2.36390266 | -1.81718416 | -0.70353600  |
| H  | -3.09587794 | -1.33667326 | -1.33662600  |
| C  | -2.36390266 | -1.81718416 | 0.70353600   |
| H  | -3.09587794 | -1.33667326 | 1.33662600   |
| C  | -1.24486902 | -2.55959006 | 1.13932600   |
| H  | -0.97668954 | -2.76208282 | 2.16673200   |
| C  | -1.24486902 | -2.55959006 | -1.13932600  |
| H  | -0.97668954 | -2.76208282 | -2.16673200  |
| C  | -0.55644307 | -3.02058315 | 0.00000000   |
| H  | 0.34573081  | -3.61442658 | 0.00000000   |
| Ba | 0.00000000  | 0.00000000  | - 0.00000000 |



Ca(Cp)<sub>2</sub> (C<sub>2</sub>,<sup>1</sup>A) E<sub>CCSD(T)/M06-2X</sub> = -1063.505155 a.u

|    |             |             |             |
|----|-------------|-------------|-------------|
| C  | 0.58755847  | -1.11806304 | 2.12920172  |
| H  | 1.11500836  | -2.05088704 | 2.00090007  |
| C  | -0.81465086 | -0.95559104 | 2.15662453  |
| H  | -1.54571422 | -1.74301104 | 2.05431470  |
| C  | -1.09177396 | 0.40909296  | 2.39129577  |
| H  | -2.07200604 | 0.84598096  | 2.50931651  |
| C  | 1.17814299  | 0.14597896  | 2.34673318  |
| H  | 2.23612372  | 0.34689696  | 2.42279765  |
| C  | 0.14008994  | 1.09088196  | 2.50805648  |
| H  | 0.26626360  | 2.13842196  | 2.73744694  |
| C  | 1.09177396  | 0.40909296  | -2.39129577 |
| H  | 2.07200604  | 0.84598096  | -2.50931651 |
| C  | -0.14008994 | 1.09088196  | -2.50805648 |
| H  | -0.26626360 | 2.13842196  | -2.73744694 |
| C  | -1.17814299 | 0.14597896  | -2.34673318 |
| H  | -2.23612372 | 0.34689696  | -2.42279765 |
| C  | 0.81465086  | -0.95559104 | -2.15662453 |
| H  | 1.54571422  | -1.74301104 | -2.05431470 |
| C  | -0.58755847 | -1.11806304 | -2.12920172 |
| H  | -1.11500836 | -2.05088704 | -2.00090007 |
| Ca | 0.00000000  | 0.30287996  | 0.00000000  |

Sr(Cp)<sub>2</sub> (C<sub>2</sub>,<sup>1</sup>A) E<sub>CCSD(T)/M06-2X</sub> = -417.094155 a.u

|    |             |             |             |
|----|-------------|-------------|-------------|
| C  | 0.43541602  | 2.13918783  | -1.30495226 |
| H  | 0.82601855  | 1.90583606  | -2.28386226 |
| C  | -0.92969186 | 2.23468240  | -0.95905026 |
| H  | -1.76402395 | 2.09105206  | -1.62904826 |
| C  | -1.01046792 | 2.61233986  | 0.39863274  |
| H  | -1.91816165 | 2.81880022  | 0.94634674  |
| C  | 1.19865473  | 2.45775365  | -0.16140926 |
| H  | 2.27576119  | 2.52101821  | -0.11599626 |
| C  | 0.30528874  | 2.74943549  | 0.89247474  |
| H  | 0.57959699  | 3.08276386  | 1.88256974  |
| C  | 1.01046792  | -2.61233986 | 0.39863274  |
| H  | 1.91816165  | -2.81880022 | 0.94634674  |
| C  | -0.30528874 | -2.74943549 | 0.89247474  |
| H  | -0.57959699 | -3.08276386 | 1.88256974  |
| C  | -1.19865473 | -2.45775365 | -0.16140926 |
| H  | -2.27576119 | -2.52101821 | -0.11599626 |
| C  | 0.92969186  | -2.23468240 | -0.95905026 |
| H  | 1.76402395  | -2.09105206 | -1.62904826 |
| C  | -0.43541602 | -2.13918783 | -1.30495226 |
| H  | -0.82601855 | -1.90583606 | -2.28386226 |
| Sr | -0.00000000 | 0.00000000  | 0.42135874  |

Ba(Cp)<sub>2</sub> (C<sub>2</sub>,<sup>1</sup>A) E<sub>CCSD(T)/M06-2X</sub> = -411.8770867 a.u

|    |             |             |             |
|----|-------------|-------------|-------------|
| C  | -0.45810186 | -1.97850586 | -1.49249702 |
| H  | -0.86897098 | -1.56918752 | -2.40315402 |
| C  | 0.91301241  | -2.12329590 | -1.19513602 |
| H  | 1.73284812  | -1.85019423 | -1.84288002 |
| C  | 1.02215902  | -2.74505692 | 0.06673298  |
| H  | 1.94199284  | -3.04078907 | 0.55013598  |
| C  | -1.19576255 | -2.50889926 | -0.41382102 |
| H  | -2.27160798 | -2.59164785 | -0.36246702 |
| C  | -0.28070108 | -2.98226987 | 0.55078498  |
| H  | -0.53392907 | -3.49522631 | 1.46716198  |
| C  | -1.02215902 | 2.74505692  | 0.06673298  |
| H  | -1.94199284 | 3.04078907  | 0.55013598  |
| C  | 0.28070108  | 2.98226987  | 0.55078498  |
| H  | 0.53392907  | 3.49522631  | 1.46716198  |
| C  | 1.19576255  | 2.50889926  | -0.41382102 |
| H  | 2.27160798  | 2.59164785  | -0.36246702 |
| C  | -0.91301241 | 2.12329590  | -1.19513602 |
| H  | -1.73284812 | 1.85019423  | -1.84288002 |
| C  | 0.45810186  | 1.97850586  | -1.49249702 |
| H  | 0.86897098  | 1.56918752  | -2.40315402 |
| Ba | -0.00000000 | 0.00000000  | 0.62481498  |

Cartesian Coordinates for the structures shown in Table. 1  
M06-2X-D3/def2-TZVPP-optimized structures (in Cartesian coordinates) for structures shown in  
Table.1

| Ca(Bz) <sub>3</sub> ( <i>D</i> <sub>3h</sub> , <sup>1</sup> A) | <i>E</i> <sub>M06-2X-D3/def2-TZVPP</sub> = -1374.302095 a.u |             |              |
|----------------------------------------------------------------|-------------------------------------------------------------|-------------|--------------|
| C                                                              | -1.34102700                                                 | 2.45207701  | 0.39267899   |
| C                                                              | -1.01194400                                                 | 2.45370001  | - 0.95401900 |
| C                                                              | 0.31695601                                                  | 2.37844901  | -1.37775700  |
| C                                                              | 1.34102700                                                  | 2.45207701  | -0.39267899  |
| C                                                              | 1.01194400                                                  | 2.45370001  | 0.95401900   |
| C                                                              | -0.31695601                                                 | 2.37844901  | 1.37775700   |
| H                                                              | -2.37543100                                                 | 2.51796001  | 0.69409699   |
| H                                                              | -1.80057599                                                 | 2.47758101  | - 1.69535401 |
| H                                                              | 0.55831901                                                  | 2.40175601  | - 2.42930100 |
| H                                                              | 2.37543100                                                  | 2.51796001  | - 0.69409699 |
| H                                                              | 1.80057599                                                  | 2.47758101  | 1.69535401   |
| H                                                              | -0.55831901                                                 | 2.40175601  | 2.42930100   |
| C                                                              | 1.45304748                                                  | -2.38740196 | -0.39267899  |
| C                                                              | 1.61899455                                                  | -2.10321921 | 0.95401900   |
| C                                                              | 2.21827527                                                  | -0.91473255 | 1.37775700   |
| C                                                              | 2.79407449                                                  | -0.06467506 | 0.39267899   |
| C                                                              | 2.63093854                                                  | -0.35048080 | -0.95401900  |
| C                                                              | 1.90131926                                                  | -1.46371646 | -1.37775700  |
| H                                                              | 0.99290184                                                  | -3.31616360 | -0.69409699  |
| H                                                              | 1.24536010                                                  | -2.79813506 | 1.69535401   |
| H                                                              | 2.35914123                                                  | -0.71735956 | 2.42930100   |
| H                                                              | 3.36833284                                                  | 0.79820359  | 0.69409699   |
| H                                                              | 3.04593609                                                  | 0.32055404  | -1.69535401  |
| H                                                              | 1.80082222                                                  | -1.68439645 | -2.42930100  |
| C                                                              | -2.63093854                                                 | -0.35048080 | 0.95401900   |
| C                                                              | -1.90131926                                                 | -1.46371646 | 1.37775700   |
| C                                                              | -1.45304748                                                 | -2.38740196 | 0.39267899   |
| C                                                              | -1.61899455                                                 | -2.10321921 | -0.95401900  |
| C                                                              | -2.21827527                                                 | -0.91473255 | -1.37775700  |
| C                                                              | -2.79407449                                                 | -0.06467506 | -0.39267899  |
| H                                                              | -3.04593609                                                 | 0.32055404  | 1.69535401   |
| H                                                              | -1.80082222                                                 | -1.68439645 | 2.42930100   |
| H                                                              | -0.99290184                                                 | -3.31616360 | 0.69409699   |
| H                                                              | -1.24536010                                                 | -2.79813506 | -1.69535401  |
| H                                                              | -2.35914123                                                 | -0.71735956 | -2.42930100  |
| H                                                              | -3.36833284                                                 | 0.79820359  | -0.69409699  |
| Ca                                                             | -0.00000000                                                 | -0.00000000 | 0.00000000   |

Sr(Bz)<sub>3</sub> (D<sub>3h</sub>, <sup>1</sup>A) E<sub>M06-2X-D3/def2-TZVPP</sub> = -727.368998 a.u

|    |             |             |             |
|----|-------------|-------------|-------------|
| C  | -0.32407699 | 2.52612306  | 1.37638500  |
| C  | 1.00766100  | 2.57596106  | 0.96056300  |
| C  | 1.34539300  | 2.56228206  | -0.38651701 |
| C  | 0.32407699  | 2.52612306  | -1.37638500 |
| C  | -1.00766100 | 2.57596106  | -0.96056300 |
| C  | -1.34539300 | 2.56228206  | 0.38651701  |
| H  | -0.57109099 | 2.56256006  | 2.42639800  |
| H  | 1.79316701  | 2.59800906  | 1.70559199  |
| H  | 2.38313100  | 2.60993806  | -0.68203301 |
| H  | 0.57109099  | 2.56256006  | -2.42639800 |
| H  | -1.79316701 | 2.59800906  | -1.70559199 |
| H  | -2.38313100 | 2.60993806  | 0.68203301  |
| C  | 1.72701722  | -2.16064056 | 0.96056300  |
| C  | 2.34972524  | -0.98240262 | 1.37638500  |
| C  | 2.89169786  | -0.11599652 | 0.38651701  |
| C  | 2.73467822  | -0.41532050 | -0.96056300 |
| C  | 2.02564825  | -1.54372044 | -1.37638500 |
| C  | 1.54630486  | -2.44628555 | -0.38651701 |
| H  | 1.35335834  | -2.85193271 | 1.70559199  |
| H  | 2.50478761  | -0.78670073 | 2.42639800  |
| H  | 3.45183816  | 0.75888295  | 0.68203301  |
| H  | 3.14652535  | 0.25392365  | -1.70559199 |
| H  | 1.93369662  | -1.77585934 | -2.42639800 |
| H  | 1.06870716  | -3.36882101 | -0.68203301 |
| C  | -2.73467822 | -0.41532050 | 0.96056300  |
| C  | -2.02564825 | -1.54372044 | 1.37638500  |
| C  | -1.54630486 | -2.44628555 | 0.38651701  |
| C  | -1.72701722 | -2.16064056 | -0.96056300 |
| C  | -2.34972524 | -0.98240262 | -1.37638500 |
| C  | -2.89169786 | -0.11599652 | -0.38651701 |
| H  | -3.14652535 | 0.25392365  | 1.70559199  |
| H  | -1.93369662 | -1.77585934 | 2.42639800  |
| H  | -1.06870716 | -3.36882101 | 0.68203301  |
| H  | -1.35335834 | -2.85193271 | -1.70559199 |
| H  | -2.50478761 | -0.78670073 | -2.42639800 |
| H  | -3.45183816 | 0.75888295  | -0.68203301 |
| Sr | -0.00000000 | -0.00000000 | 0.00000000  |

Ba(Bz)<sub>3</sub> (*D*<sub>3h</sub>, <sup>1</sup>A) E<sub>M06-2X-D3/def2-TZVPP</sub> = -722.143010 a.u

|    |             |             |             |
|----|-------------|-------------|-------------|
| C  | -0.43465993 | 2.74160198  | 1.34068202  |
| C  | 0.92268006  | 2.76376898  | 1.04533195  |
| C  | 1.37424098  | 2.73165698  | -0.27585208 |
| C  | 0.43465993  | 2.74160198  | -1.34068202 |
| C  | -0.92268006 | 2.76376898  | -1.04533195 |
| C  | -1.37424098 | 2.73165698  | 0.27585208  |
| H  | -0.76848887 | 2.78231598  | 2.36730804  |
| H  | 1.64227610  | 2.78718398  | 1.85435691  |
| H  | 2.43268497  | 2.77303298  | -0.48703813 |
| H  | 0.76848887  | 2.78231598  | -2.36730804 |
| H  | -1.64227610 | 2.78718398  | -1.85435691 |
| H  | -2.43268497 | 2.77303298  | 0.48703813  |
| C  | 1.93215412  | -2.18094886 | 1.04533195  |
| C  | 2.59162692  | -0.99437445 | 1.34068202  |
| C  | 3.05280483  | -0.17570089 | 0.27585208  |
| C  | 2.85483417  | -0.58282012 | -1.04533195 |
| C  | 2.15696700  | -1.74722753 | -1.34068202 |
| C  | 1.67856385  | -2.55595609 | -0.27585208 |
| H  | 1.59263408  | -2.81584481 | 1.85435691  |
| H  | 2.79380075  | -0.72562711 | 2.36730804  |
| H  | 3.61785949  | 0.72025050  | 0.48703813  |
| H  | 3.23491018  | 0.02866084  | -1.85435691 |
| H  | 2.02531188  | -2.05668887 | -2.36730804 |
| H  | 1.18517452  | -3.49328348 | -0.48703813 |
| C  | -2.85483417 | -0.58282012 | 1.04533195  |
| C  | -2.15696700 | -1.74722753 | 1.34068202  |
| C  | -1.67856385 | -2.55595609 | 0.27585208  |
| C  | -1.93215412 | -2.18094886 | -1.04533195 |
| C  | -2.59162692 | -0.99437445 | -1.34068202 |
| C  | -3.05280483 | -0.17570089 | -0.27585208 |
| H  | -3.23491018 | 0.02866084  | 1.85435691  |
| H  | -2.02531188 | -2.05668887 | 2.36730804  |
| H  | -1.18517452 | -3.49328348 | 0.48703813  |
| H  | -1.59263408 | -2.81584481 | -1.85435691 |
| H  | -2.79380075 | -0.72562711 | -2.36730804 |
| H  | -3.61785949 | 0.72025050  | -0.48703813 |
| Ba | 0.00000000  | 0.00000000  | -0.00000000 |

Na[Ca(Cp)<sub>3</sub>] (C<sub>3</sub>,<sup>1</sup>A) E<sub>CCSD(T)/M06-2X</sub> = -1418.769832 a.u

|    |             |             |             |
|----|-------------|-------------|-------------|
| C  | 2.02346452  | 1.86825099  | 0.17664990  |
| H  | 1.73707209  | 2.90654370  | 0.21368391  |
| C  | 2.39505228  | 1.07483051  | 1.26884089  |
| H  | 2.46848354  | 1.40634430  | 2.29410989  |
| C  | 2.70896853  | -0.22106596 | 0.78894088  |
| H  | 3.04139892  | -1.05669092 | 1.38476887  |
| C  | 2.09046423  | 1.06868075  | 0.98656210  |
| H  | 2.02708510  | 1.45184263  | -2.00042410 |
| C  | 2.53497591  | -0.22153368 | -0.60071611 |
| H  | 2.73650183  | -1.05483842 | -1.25798612 |
| C  | -1.45934175 | -2.08458669 | -0.60071611 |
| H  | -2.28176778 | -1.84246089 | -1.25798612 |
| C  | -1.54593300 | -2.23550259 | 0.78894088  |
| H  | -2.43582064 | -2.10558327 | 1.38476887  |
| C  | -0.26669562 | -2.61159137 | 1.26884089  |
| H  | -0.01631188 | -2.84094160 | 2.29410989  |
| C  | -0.11972744 | -2.34473551 | -0.98656210 |
| H  | 0.24379005  | -2.48142851 | -2.00042410 |
| C  | 0.60622056  | -2.68649717 | 0.17664990  |
| H  | 1.64860463  | -2.95762041 | 0.21368391  |
| C  | -1.07563416 | 2.30612038  | -0.60071611 |
| H  | -0.45473404 | 2.89729931  | -1.25798612 |
| C  | -1.16303553 | 2.45656854  | 0.78894088  |
| H  | -0.60557828 | 3.16227419  | 1.38476887  |
| C  | -2.12835666 | 1.53676087  | 1.26884089  |
| H  | -2.45217166 | 1.43459731  | 2.29410989  |
| C  | -1.97073680 | 1.27605476  | -0.98656210 |
| H  | -2.27087515 | 1.02958588  | -2.00042410 |
| C  | -2.62968508 | 0.81824618  | 0.17664990  |
| H  | -3.38567673 | 0.05107671  | 0.21368391  |
| Na | -0.00000000 | 0.00000000  | -2.31320207 |
| Ca | -0.00000000 | -0.00000000 | 0.59469993  |

| Na[Sr(Cp) <sub>3</sub> ] (C <sub>3</sub> , <sup>1</sup> A) E <sub>CCSD(T)/M06-2X</sub> = -772.3680229 a.u |             |             |             |
|-----------------------------------------------------------------------------------------------------------|-------------|-------------|-------------|
| C                                                                                                         | 1.72606374  | -2.26344119 | 0.07530209  |
| H                                                                                                         | 2.78401710  | -2.06218693 | 0.13165512  |
| C                                                                                                         | 0.90162736  | -2.66684777 | 1.13376606  |
| H                                                                                                         | 1.22245892  | -2.85045618 | 2.14889006  |
| C                                                                                                         | -0.41141387 | -2.84366473 | 0.63258002  |
| H                                                                                                         | -1.27159496 | -3.16816899 | 1.19788099  |
| C                                                                                                         | 0.92945106  | -2.18644005 | -1.09030193 |
| H                                                                                                         | 1.32517767  | -2.07907462 | -2.09572392 |
| C                                                                                                         | -0.39171594 | -2.56234718 | -0.74005898 |
| H                                                                                                         | -1.23393127 | -2.65854411 | -1.41041700 |
| C                                                                                                         | -2.02319978 | 1.62040955  | -0.74005898 |
| H                                                                                                         | -1.68540110 | 2.39788789  | -1.41041700 |
| C                                                                                                         | -2.25697896 | 1.77812723  | 0.63258002  |
| H                                                                                                         | -2.10791735 | 2.68531804  | 1.19788099  |
| C                                                                                                         | -2.76037160 | 0.55259169  | 1.13376606  |
| H                                                                                                         | -3.07979693 | 0.36654761  | 2.14889006  |
| C                                                                                                         | -2.35823816 | 0.28829180  | -1.09030193 |
| H                                                                                                         | -2.46312027 | -0.10810022 | -2.09572392 |
| C                                                                                                         | -2.82322944 | -0.36309445 | 0.07530209  |
| H                                                                                                         | -3.17791482 | -1.37993606 | 0.13165512  |
| C                                                                                                         | 2.41491572  | 0.94193763  | -0.74005898 |
| H                                                                                                         | 2.91933237  | 0.26065623  | -1.41041700 |
| C                                                                                                         | 2.66839284  | 1.06553750  | 0.63258002  |
| H                                                                                                         | 3.37951231  | 0.48285095  | 1.19788099  |
| C                                                                                                         | 1.85874424  | 2.11425609  | 1.13376606  |
| H                                                                                                         | 1.85733801  | 2.48390857  | 2.14889006  |
| C                                                                                                         | 1.42878710  | 1.89814826  | -1.09030193 |
| H                                                                                                         | 1.13794260  | 2.18717484  | -2.09572392 |
| C                                                                                                         | 1.09716570  | 2.62653564  | 0.07530209  |
| H                                                                                                         | 0.39389773  | 3.44212300  | 0.13165512  |
| Sr                                                                                                        | 0.00000000  | -0.00000000 | 0.67335808  |
| Na                                                                                                        | 0.00000000  | -0.00000000 | -2.33705792 |



Na[Ba(Cp)<sub>3</sub>] (C<sub>3</sub>,<sup>1</sup>A) E<sub>CCSD(T)/M06-2X</sub> = -767.1584035 a.u

|    |             |             |             |
|----|-------------|-------------|-------------|
| C  | 1.95693800  | 2.21618300  | -0.06666900 |
| H  | 1.55048600  | 3.21304200  | 0.00613500  |
| C  | 2.61734800  | 1.51112700  | 0.94861100  |
| H  | 2.81829600  | 1.87933400  | 1.94445200  |
| C  | 3.01855000  | 0.25661500  | 0.43170000  |
| H  | 3.56857900  | -0.50660200 | 0.96131500  |
| C  | 1.95186100  | 1.40412000  | -1.22363300 |
| H  | 1.68057700  | 1.75749300  | -2.21393100 |
| C  | 2.62117300  | 0.19500500  | -0.91150400 |
| H  | 2.84136400  | -0.61671800 | -1.59075000 |
| C  | -1.14170700 | -2.36750500 | -0.91150400 |
| H  | -1.95477500 | -2.15233500 | -1.59075000 |
| C  | -1.28704000 | -2.74244800 | 0.43170000  |
| H  | -2.22301900 | -2.83717900 | 0.96131500  |
| C  | 0.00000000  | -3.02225300 | 0.94861100  |
| H  | 0.21840300  | -3.38038300 | 1.94445200  |
| C  | 0.24007300  | -2.39242100 | -1.22363300 |
| H  | 0.68174500  | -2.33416900 | -2.21393100 |
| C  | 0.94080200  | -2.80284900 | -0.06666900 |
| H  | 2.00733300  | -2.94928100 | 0.00613500  |
| C  | -1.47946500 | 2.17250000  | -0.91150400 |
| H  | -0.88658900 | 2.76905200  | -1.59075000 |
| C  | -1.73151000 | 2.48583300  | 0.43170000  |
| H  | -1.34556000 | 3.34378100  | 0.96131500  |
| C  | -2.61734800 | 1.51112700  | 0.94861100  |
| H  | -3.03669900 | 1.50104900  | 1.94445200  |
| C  | -2.19193400 | 0.98830100  | -1.22363300 |
| H  | -2.36232200 | 0.57667600  | -2.21393100 |
| C  | -2.89774000 | 0.58666700  | -0.06666900 |
| H  | -3.55781900 | -0.26376100 | 0.00613500  |
| Na | 0.00000000  | 0.00000000  | -2.35960100 |
| Ba | 0.00000000  | 0.00000000  | 0.77537300  |

Cartesian Coordinates for the structures shown in Fig.S4

M06-2X-D3/def2-TZVPP-optimized structures (in Cartesian coordinates) for structures shown in Fig.S4

Ca(Me)<sub>3</sub> (C<sub>3v</sub>,<sup>1</sup>A) E<sub>M06-2X-D3/def2-TZVPP</sub> = -797.282607 a.u

|    |             |             |             |
|----|-------------|-------------|-------------|
| C  | 0.00000000  | 2.52379000  | 0.00182100  |
| H  | -0.01928300 | 2.95511000  | -1.01018800 |
| H  | 0.88690400  | 2.95568000  | 0.48734100  |
| H  | -0.86923700 | 2.95430000  | 0.51957100  |
| C  | -2.18566700 | -1.26189500 | 0.00182100  |
| H  | -3.00314600 | -0.70975800 | 0.48734100  |
| H  | -2.12388000 | -2.22993100 | 0.51957100  |
| H  | -2.54955900 | -1.49425500 | -1.01018800 |
| C  | 2.18566700  | -1.26189500 | 0.00182100  |
| H  | 2.56884200  | -1.46085500 | -1.01018800 |
| H  | 2.11624100  | -2.24592200 | 0.48734100  |
| H  | 2.99311700  | -0.72436900 | 0.51957100  |
| Ca | 0.00000000  | 0.00000000  | -0.00114800 |

Sr(Me)<sub>3</sub> (C<sub>3v</sub>,<sup>1</sup>A) E<sub>M06-2X-D3/def2-TZVPP</sub> = -150.329358a.u

|    |             |             |             |
|----|-------------|-------------|-------------|
| C  | -0.02406591 | 2.68670533  | 0.00022778  |
| H  | -0.04490660 | 3.11540186  | -1.01355122 |
| H  | 0.85816359  | 3.12869123  | 0.48672978  |
| H  | -0.89806300 | 3.11195995  | 0.51572978  |
| C  | -2.31472211 | -1.36419435 | 0.00022778  |
| H  | -3.13860788 | -0.82115414 | 0.48672978  |
| H  | -2.24600487 | -2.33372535 | 0.51572978  |
| H  | -2.67556385 | -1.59659119 | -1.01355122 |
| C  | 2.33878802  | -1.32251097 | 0.00022778  |
| H  | 2.72047045  | -1.51881067 | -1.01355122 |
| H  | 2.28044429  | -2.30753708 | 0.48672978  |
| H  | 3.14406787  | -0.77823460 | 0.51572978  |
| Sr | 0.00000000  | -0.00000000 | 0.00076777  |

Ba(Me)<sub>3</sub> (C<sub>3v</sub>,<sup>1</sup>A) E<sub>M06-2X-D3/def2-TZVPP</sub> = -145.090523a.u

|   |             |             |             |
|---|-------------|-------------|-------------|
| C | 1.07853169  | 2.64440372  | -0.04118793 |
| H | 1.27089585  | 3.04309937  | 0.96786007  |
| H | 0.41599525  | 3.37891078  | -0.52392693 |
| H | 2.04132165  | 2.71302813  | -0.57021393 |
| C | 1.75085496  | -2.25623770 | -0.04118793 |
| H | 2.71822494  | -2.04971784 | -0.52392693 |
| H | 1.32889046  | -3.12435048 | -0.57021393 |
| H | 1.99995344  | -2.62217778 | 0.96786007  |
| C | -2.82938664 | -0.38816602 | -0.04118793 |
| H | -3.27084929 | -0.42092160 | 0.96786007  |

|    |             |             |             |
|----|-------------|-------------|-------------|
| H  | -3.13422019 | -1.32919293 | -0.52392693 |
| H  | -3.37021211 | 0.41132234  | -0.57021393 |
| Ba | -0.00000000 | 0.00000000  | 0.02000404  |

CaCp(Me)<sub>2</sub> (C<sub>s</sub>,<sup>1</sup>A') E<sub>M06-2X-D3/def2-TZVPP</sub> = -950.962787a.u

|    |             |             |             |
|----|-------------|-------------|-------------|
| C  | -1.20071685 | -1.61236105 | 0.00000000  |
| C  | -0.37195082 | -1.61613589 | 1.14190400  |
| H  | -0.70289922 | -1.59880169 | 2.16918200  |
| C  | 0.96729342  | -1.62104995 | 0.70612700  |
| H  | 1.83912697  | -1.62550025 | 1.34376500  |
| C  | -0.37195082 | -1.61613589 | -1.14190400 |
| H  | -0.70289922 | -1.59880169 | -2.16918200 |
| C  | 0.96729342  | -1.62104995 | -0.70612700 |
| H  | 1.83912697  | -1.62550025 | -1.34376500 |
| H  | -2.28120368 | -1.62170828 | 0.00000000  |
| C  | -0.00065628 | 2.13860333  | 2.14945700  |
| H  | 0.09789795  | 3.22489828  | 2.01652400  |
| H  | -0.92513206 | 1.98797093  | 2.72671200  |
| H  | 0.81488814  | 1.83904396  | 2.82421900  |
| C  | -0.00065628 | 2.13860333  | -2.14945700 |
| H  | -0.92513206 | 1.98797093  | -2.72671200 |
| H  | 0.09789795  | 3.22489828  | -2.01652400 |
| H  | 0.81488814  | 1.83904396  | -2.82421900 |
| Ca | 0.00507527  | 0.84118211  | 0.00000000  |

SrCp(Me)<sub>2</sub> (C<sub>s</sub>,<sup>1</sup>A') E<sub>M06-2X-D3/def2-TZVPP</sub> = -304.012728a.u

|   |             |             |             |
|---|-------------|-------------|-------------|
| C | -1.01697400 | -2.02795400 | 0.00000000  |
| C | -0.19183600 | -1.95272400 | 1.14172600  |
| H | -0.52187000 | -1.98219900 | 2.16943200  |
| C | 1.14158400  | -1.82836800 | 0.70594400  |
| H | 2.01146900  | -1.76196500 | 1.34335700  |
| C | -0.19183600 | -1.95272400 | -1.14172600 |
| H | -0.52187000 | -1.98219900 | -2.16943200 |
| C | 1.14158400  | -1.82836800 | -0.70594400 |
| H | 2.01146900  | -1.76196500 | -1.34335700 |
| H | -2.09083700 | -2.15064700 | 0.00000000  |
| C | -0.19183600 | 2.13300900  | 2.26622100  |
| H | -1.04477200 | 2.82753600  | 2.28633100  |
| H | -0.27953300 | 1.51926000  | 3.17389700  |
| H | 0.69953500  | 2.76115000  | 2.41409500  |
| C | -0.19183600 | 2.13300900  | -2.26622100 |
| H | -0.27953300 | 1.51926000  | -3.17389700 |
| H | -1.04477200 | 2.82753600  | -2.28633100 |

|    |             |            |             |
|----|-------------|------------|-------------|
| H  | 0.69953500  | 2.76115000 | -2.41409500 |
| Sr | -0.06926100 | 0.72020500 | 0.00000000  |

BaCp(Me)<sub>2</sub> (C<sub>s</sub>, <sup>1</sup>A') E<sub>M06-2X-D3/def2-TZVPP</sub> = -298.776119a.u

|    |             |             |             |
|----|-------------|-------------|-------------|
| C  | -1.64436600 | -1.89171100 | 0.00000000  |
| C  | -0.83628200 | -2.07372600 | 1.14150200  |
| H  | -1.16192700 | -2.00908600 | 2.16946000  |
| C  | 0.47096400  | -2.36092900 | 0.70592000  |
| H  | 1.31878500  | -2.56914700 | 1.34308700  |
| C  | -0.83628200 | -2.07372600 | -1.14150200 |
| H  | -1.16192700 | -2.00908600 | -2.16946000 |
| C  | 0.47096400  | -2.36092900 | -0.70592000 |
| H  | 1.31878500  | -2.56914700 | -1.34308700 |
| H  | -2.70611800 | -1.68775600 | 0.00000000  |
| C  | 0.47096400  | 2.10836900  | 2.41995100  |
| H  | -0.28155800 | 2.90306100  | 2.54114900  |
| H  | 0.40336900  | 1.49175500  | 3.32810400  |
| H  | 1.44500100  | 2.61881500  | 2.47504000  |
| C  | 0.47096400  | 2.10836900  | -2.41995100 |
| H  | 0.40336900  | 1.49175500  | -3.32810400 |
| H  | -0.28155800 | 2.90306100  | -2.54114900 |
| H  | 1.44500100  | 2.61881500  | -2.47504000 |
| Ba | 0.14030700  | 0.64433300  | 0.00000000  |

| Ca(Cp) <sub>2</sub> Me (C <sub>s</sub> , <sup>1</sup> A) E <sub>M06-2X-D3/def2-TZVPP</sub> = -1104.641957 a.u |             |             |             |
|---------------------------------------------------------------------------------------------------------------|-------------|-------------|-------------|
| C                                                                                                             | 1.74867164  | -1.61848243 | 0.00000000  |
| H                                                                                                             | 1.29841551  | -2.59973014 | 0.00000000  |
| C                                                                                                             | 2.08347566  | -0.86032193 | 1.14007900  |
| H                                                                                                             | 1.95527937  | -1.17070155 | 2.16708200  |
| C                                                                                                             | 2.63066432  | 0.36618182  | 0.70338300  |
| H                                                                                                             | 2.96887266  | 1.17428224  | 1.33415300  |
| C                                                                                                             | 2.08347566  | -0.86032193 | -1.14007900 |
| H                                                                                                             | 1.95527937  | -1.17070155 | -2.16708200 |
| C                                                                                                             | 2.63066432  | 0.36618182  | -0.70338300 |
| H                                                                                                             | 2.96887266  | 1.17428224  | -1.33415300 |
| C                                                                                                             | -2.37134737 | -0.22491063 | -1.13938300 |
| H                                                                                                             | -2.51659447 | 0.07753972  | -2.16632200 |
| C                                                                                                             | -2.72485218 | 0.52477214  | 0.00000000  |
| H                                                                                                             | -3.15044498 | 1.51622865  | 0.00000000  |
| C                                                                                                             | -2.37134737 | -0.22491063 | 1.13938300  |
| H                                                                                                             | -2.51659447 | 0.07753972  | 2.16632200  |
| C                                                                                                             | -1.80098812 | -1.44131425 | -0.70405800 |
| H                                                                                                             | -1.42535967 | -2.23144304 | -1.33736300 |
| C                                                                                                             | -1.80098812 | -1.44131425 | 0.70405800  |
| H                                                                                                             | -1.42535967 | -2.23144304 | 1.33736300  |
| C                                                                                                             | -0.07112979 | 2.98500444  | 0.00000000  |
| H                                                                                                             | -0.61258570 | 3.37656843  | -0.87455000 |
| H                                                                                                             | -0.61258570 | 3.37656843  | 0.87455000  |
| H                                                                                                             | 0.90982265  | 3.47974869  | 0.00000000  |
| Ca                                                                                                            | -0.00074047 | 0.48639381  | 0.00000000  |

| Sr(Cp) <sub>2</sub> Me (C <sub>s</sub> , <sup>1</sup> A) E <sub>M06-2X-D3/def2-TZVPP</sub> = -457.696770 a.u |             |             |             |
|--------------------------------------------------------------------------------------------------------------|-------------|-------------|-------------|
| C                                                                                                            | 1.86115523  | -1.74372994 | 0.00000000  |
| H                                                                                                            | 1.39476434  | -2.71780546 | 0.00000000  |
| C                                                                                                            | 2.21459382  | -0.99418032 | 1.13996800  |
| H                                                                                                            | 2.08727072  | -1.30554251 | 2.16703900  |
| C                                                                                                            | 2.79054477  | 0.21897210  | 0.70373300  |
| H                                                                                                            | 3.16388082  | 1.01169644  | 1.33494100  |
| C                                                                                                            | 2.21459382  | -0.99418032 | -1.13996800 |
| H                                                                                                            | 2.08727072  | -1.30554251 | -2.16703900 |
| C                                                                                                            | 2.79054477  | 0.21897210  | -0.70373300 |
| H                                                                                                            | 3.16388082  | 1.01169644  | -1.33494100 |
| C                                                                                                            | -2.51765016 | -0.36585359 | -1.13951900 |
| H                                                                                                            | -2.68003201 | -0.07202732 | -2.16669900 |
| C                                                                                                            | -2.88684274 | 0.37686120  | 0.00000000  |
| H                                                                                                            | -3.35293658 | 1.35044186  | 0.00000000  |
| C                                                                                                            | -2.51765016 | -0.36585359 | 1.13951900  |
| H                                                                                                            | -2.68003201 | -0.07202732 | 2.16669900  |

|    |             |             |             |
|----|-------------|-------------|-------------|
| C  | -1.92067732 | -1.56867205 | -0.70412700 |
| H  | -1.53511851 | -2.35450029 | -1.33729600 |
| C  | -1.92067732 | -1.56867205 | 0.70412700  |
| H  | -1.53511851 | -2.35450029 | 1.33729600  |
| C  | -0.07292741 | 3.13281444  | 0.00000000  |
| H  | -0.60789614 | 3.53063747  | -0.87534300 |
| H  | -0.60789614 | 3.53063747  | 0.87534300  |
| H  | 0.91421213  | 3.61560911  | 0.00000000  |
| Sr | -0.00058667 | 0.47506208  | 0.00000000  |

Ba(Cp)<sub>2</sub>Me (C<sub>s</sub>, <sup>1</sup>A) E<sub>M06-2X-D3/def2-TZVPP</sub> = -452.463924 a.u

|    |             |             |             |
|----|-------------|-------------|-------------|
| C  | 2.65066800  | -0.80943100 | 0.00000000  |
| H  | 2.65742100  | -1.88976900 | 0.00000000  |
| C  | 2.64797600  | 0.01919800  | 1.13959600  |
| H  | 2.67304000  | -0.31629500 | 2.16692600  |
| C  | 2.64797600  | 1.36166000  | 0.70359100  |
| H  | 2.65473400  | 2.23789800  | 1.33545500  |
| C  | 2.64797600  | 0.01919800  | -1.13959600 |
| H  | 2.67304000  | -0.31629500 | -2.16692600 |
| C  | 2.64797600  | 1.36166000  | -0.70359100 |
| H  | 2.65473400  | 2.23789800  | -1.33545500 |
| C  | -2.25392700 | -1.58014600 | -1.13920700 |
| H  | -2.52843400 | -1.38636900 | -2.16660400 |
| C  | -2.89938400 | -1.05922200 | 0.00000000  |
| H  | -3.73837800 | -0.37936700 | 0.00000000  |
| C  | -2.25392700 | -1.58014600 | 1.13920700  |
| H  | -2.52843400 | -1.38636900 | 2.16660400  |
| C  | -1.21068700 | -2.42451700 | -0.70405900 |
| H  | -0.53909200 | -2.98624700 | -1.33742800 |
| C  | -1.21068700 | -2.42451700 | 0.70405900  |
| H  | -0.53909200 | -2.98624700 | 1.33742800  |
| C  | -1.42019300 | 2.94831900  | 0.00000000  |
| H  | -2.06676100 | 3.10817800  | -0.87616100 |
| H  | -2.06676100 | 3.10817800  | 0.87616100  |
| H  | -0.69809800 | 3.77777900  | 0.00000000  |
| Ba | -0.18875900 | 0.39615500  | 0.00000000  |
